# Supplementary material for: Disparities in Access to Mental Health Services Among Patients Hospitalized for Deliberate Drug Overdose
Source: Atypon-hosted journal article supplement (doi:10.1176/appi.ps.201800496), 2019-05-14
Supplement: appi.ps.201800496.ds001.pdf [file appi.ps.201800496.ds001.pdf]

**Table.** Comparison of adjusted odds ratios from main analyses (generalized estimating equations) and sensitivity analyses (limited to one admission per patient)

| Characteristics                                          | Mental health assessment outcome |           |                      |           | Discharge disposition outcome |           |                      |           |
|----------------------------------------------------------|----------------------------------|-----------|----------------------|-----------|-------------------------------|-----------|----------------------|-----------|
|                                                          | Main GEE analysis                |           | Sensitivity analysis |           | Main GEE analysis             |           | Sensitivity analysis |           |
|                                                          | AOR                              | 95% CI    | AOR                  | 95% CI    | AOR                           | 95% CI    | AOR                  | 95% CI    |
| <b>Patient</b>                                           |                                  |           |                      |           |                               |           |                      |           |
| Age (years) (reference: 18-24)                           |                                  |           |                      |           |                               |           |                      |           |
| 25-34                                                    | .91                              | .51-1.60  | .96                  | .54-1.70  | .80                           | .61-1.09  | .81                  | .60-.1.10 |
| 35-44                                                    | 1.06                             | .60-1.85  | 1.05                 | .60-1.84  | .87                           | .66-1.14  | .85                  | .64-1.14  |
| 45-54                                                    | 1.08                             | .62-1.89  | 1.14                 | .64-2.00  | .66**                         | .51-.90   | .65**                | .49-.88   |
| 55-64                                                    | .75                              | .41-1.39  | .77                  | .41-1.43  | .75                           | .54-1.07  | .77                  | .55-1.09  |
| Gender (reference: male)                                 |                                  |           |                      |           |                               |           |                      |           |
| Female                                                   | 1.07                             | .75-1.54  | 1.00                 | .70-1.44  | 1.10                          | .92-1.31  | 1.11                 | .93-1.34  |
| Race (reference: non-Hispanic white)                     |                                  |           |                      |           |                               |           |                      |           |
| Non-Hispanic black                                       | .52**                            | .34-.81   | .52**                | .34-.81   | .60***                        | .47-.77   | .57***               | .44-.74   |
| Other race                                               | .24***                           | .12-.49   | .28***               | .14-.57   | 1.07                          | .66-1.73  | 1.11                 | .67-1.81  |
| Insurance payer (reference: uninsured)                   |                                  |           |                      |           |                               |           |                      |           |
| Medicare                                                 | .97                              | .58-1.62  | 1.00                 | .60-1.68  | 3.06***                       | 2.36-3.96 | 3.08***              | 2.33-4.06 |
| Medicaid                                                 | 1.37                             | .82-2.32  | 1.46                 | .85-2.49  | 1.02                          | .80-1.29  | .93                  | .72-1.19  |
| Private                                                  | .80                              | .52-1.25  | .84                  | .54-1.30  | 2.78***                       | 2.23-3.47 | 2.82***              | 2.23-3.56 |
| Other payer                                              | .62                              | .24-1.59  | .63                  | .25-1.61  | 7.56***                       | 4.21-13.6 | 6.78***              | 3.83-12.0 |
| <b>Hospitalization</b>                                   |                                  |           |                      |           |                               |           |                      |           |
| Drug ingested (reference: opioids or sedative-hypnotics) |                                  |           |                      |           |                               |           |                      |           |
| Drugs with high abuse or misuse liability <sup>b</sup>   | 1.69*                            | 1.03-2.78 | 1.78*                | 1.07-2.97 | 1.19                          | .95-1.50  | 1.25                 | .99-1.58  |
| Other drugs, medicinals, or biologicals                  | 1.07                             | .74-1.55  | 1.09                 | .75-1.59  | 1.07                          | .87-1.30  | 1.07                 | .87-1.31  |
| Length of stay                                           | 1.03                             | .98-1.07  | 1.04                 | .98-1.10  | .97**                         | .95-.99   | .97*                 | .94-.99   |
| Weekend admission (reference: weekday admission)         | .97                              | .67-1.38  | .94                  | .65-1.36  | N/A                           | N/A       | N/A                  | N/A       |
| Weekend discharge (reference: weekday discharge)         | N/A                              | N/A       | N/A                  | N/A       | 1.07                          | .85-1.35  | 1.04                 | .82-1.33  |

Abbreviations: GEE, generalized estimating equations; AOR, adjusted odds ratio; CI, confidence interval.

a Models adjusted for patient and hospitalization characteristics, recent mental health services, and hospital fixed effects. Model examining disposition outcome additionally adjusted for presence of mental disorder during hospitalization.

b These drugs include central nervous system (CNS) stimulants, psychotropic agents, and other CNS depressants and anesthetics.

\*p<.05, \*\*p<.01, \*\*\*p<.001
